# Supplementary material
Source: PubMed Central journal article supplement (PMC7278346)
Supplement: supp_RA120.013079_158888_3_supp_519637_q9gh6x.pdf [file supp_RA120.013079_158888_3_supp_519637_q9gh6x.pdf]

## Supplementary Information

### **Essential roles of FUT8 SH3 domain in core fucosylation**

Seita Tomida, Misaki Takata, Tetsuya Hirata, Masamichi Nagae, Miyako Nakano, Yasuhiko Kizuka\*

Correspondence: Yasuhiko Kizuka, Ph.D

Email: [kizuka@gifu-u.ac.jp](mailto:kizuka@gifu-u.ac.jp)

#### **This Supplemental information includes:**

Fig. S1-6 (included in this PDF)

Tables S1, S2 (included in this PDF)

## Figure S1

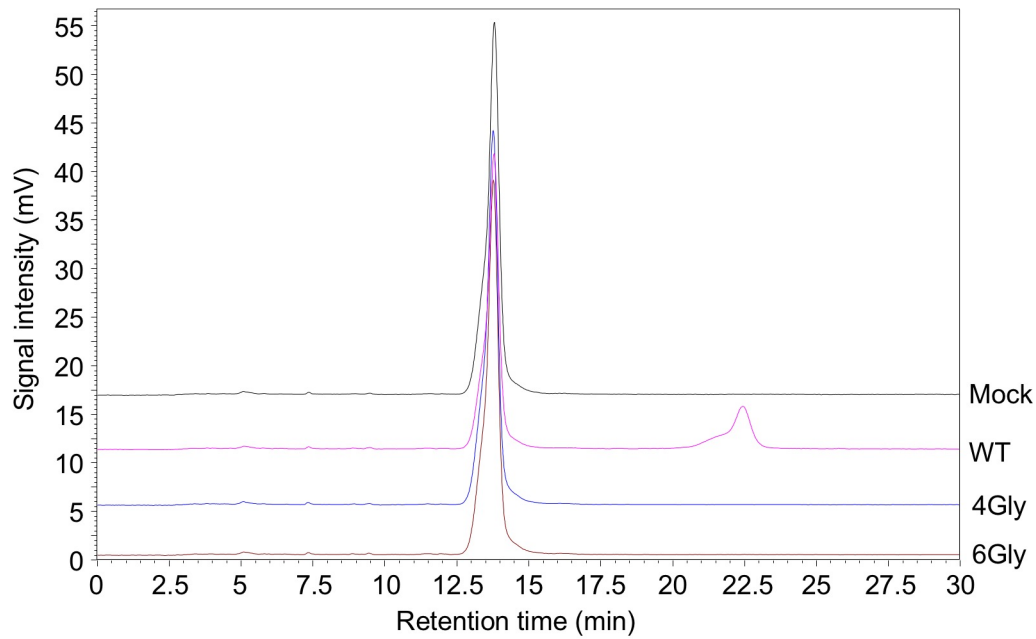

Supplemental Fig. S1. Wider view of Fig. 1F chromatogram.

## Figure S2

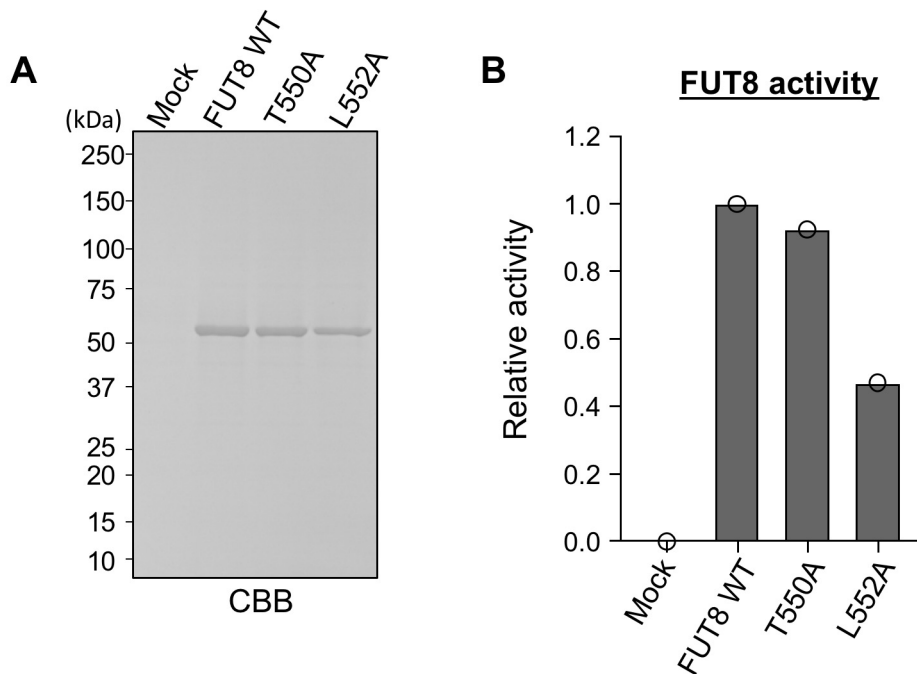

Supplemental Fig. S2. Activity of T550A and L552A single mutants. (A) Soluble forms of two FUT8 point mutants (T550A and L552A) were expressed and purified from the COS7 culture media, and then subjected to CBB staining. (B) Purified point mutants were mixed with the FUT8 substrates, and the reaction mixtures were separated by HPLC. The activity relative to that of FUT8 WT was calculated by the peak area.

## Figure S3

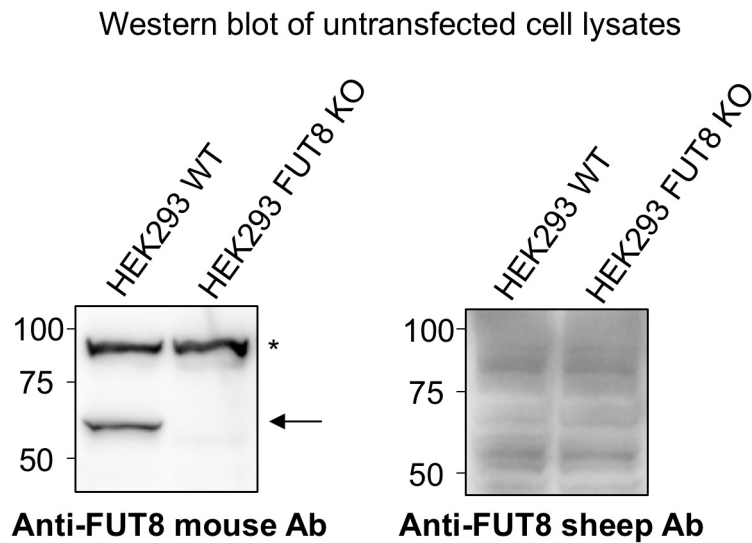

**Supplemental Fig. S3. Validation of the antibody specificities for detection of endogenous FUT8.** HEK293 WT or FUT8 KO cell lysates were analyzed by western blotting with mouse or sheep anti-FUT8 Ab. Asterisk and arrow indicates non-specific binding and FUT8, respectively.

## Figure S4

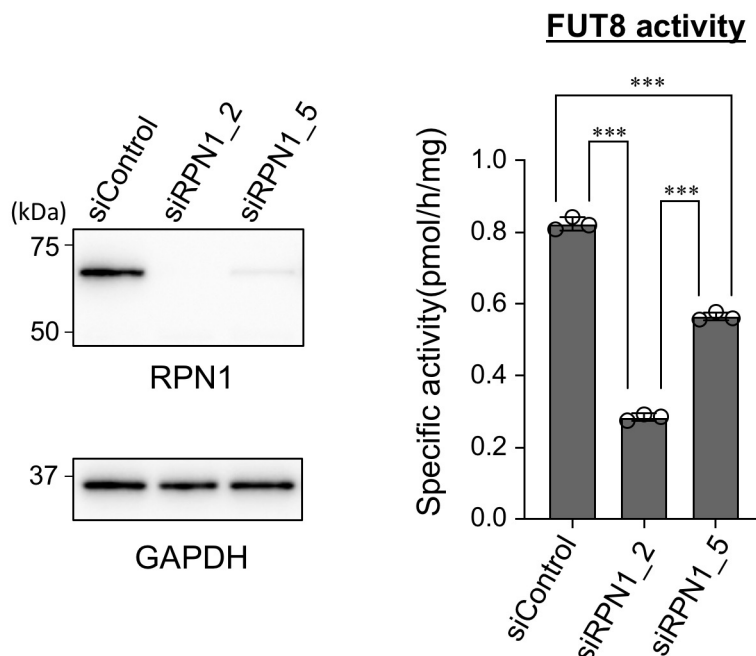

**Supplemental Fig. S4. Reduced FUT8 activity of RPN1-knockdown.** (A) HEK293 WT cells were treated with two kinds of siRPN1 or siControl for 96 h. The cell lysates were analyzed by western blotting with anti-RPN1, and anti-GAPDH Abs. (B) The lysates of HEK293 WT cells treated with two kinds of siRPN1 or siControl (96 h) were incubated with the FUT8 acceptor substrate and GDP-Fuc, and the acceptor substrates and products were separated by HPLC. The FUT8 specific activities were calculated by the peak areas and shown as the mean  $\pm$  SD ( $n = 3$ , triplicates from one sample, \*\*\* $p < 0.001$ , Tukey-Kramer test).

Figure S5

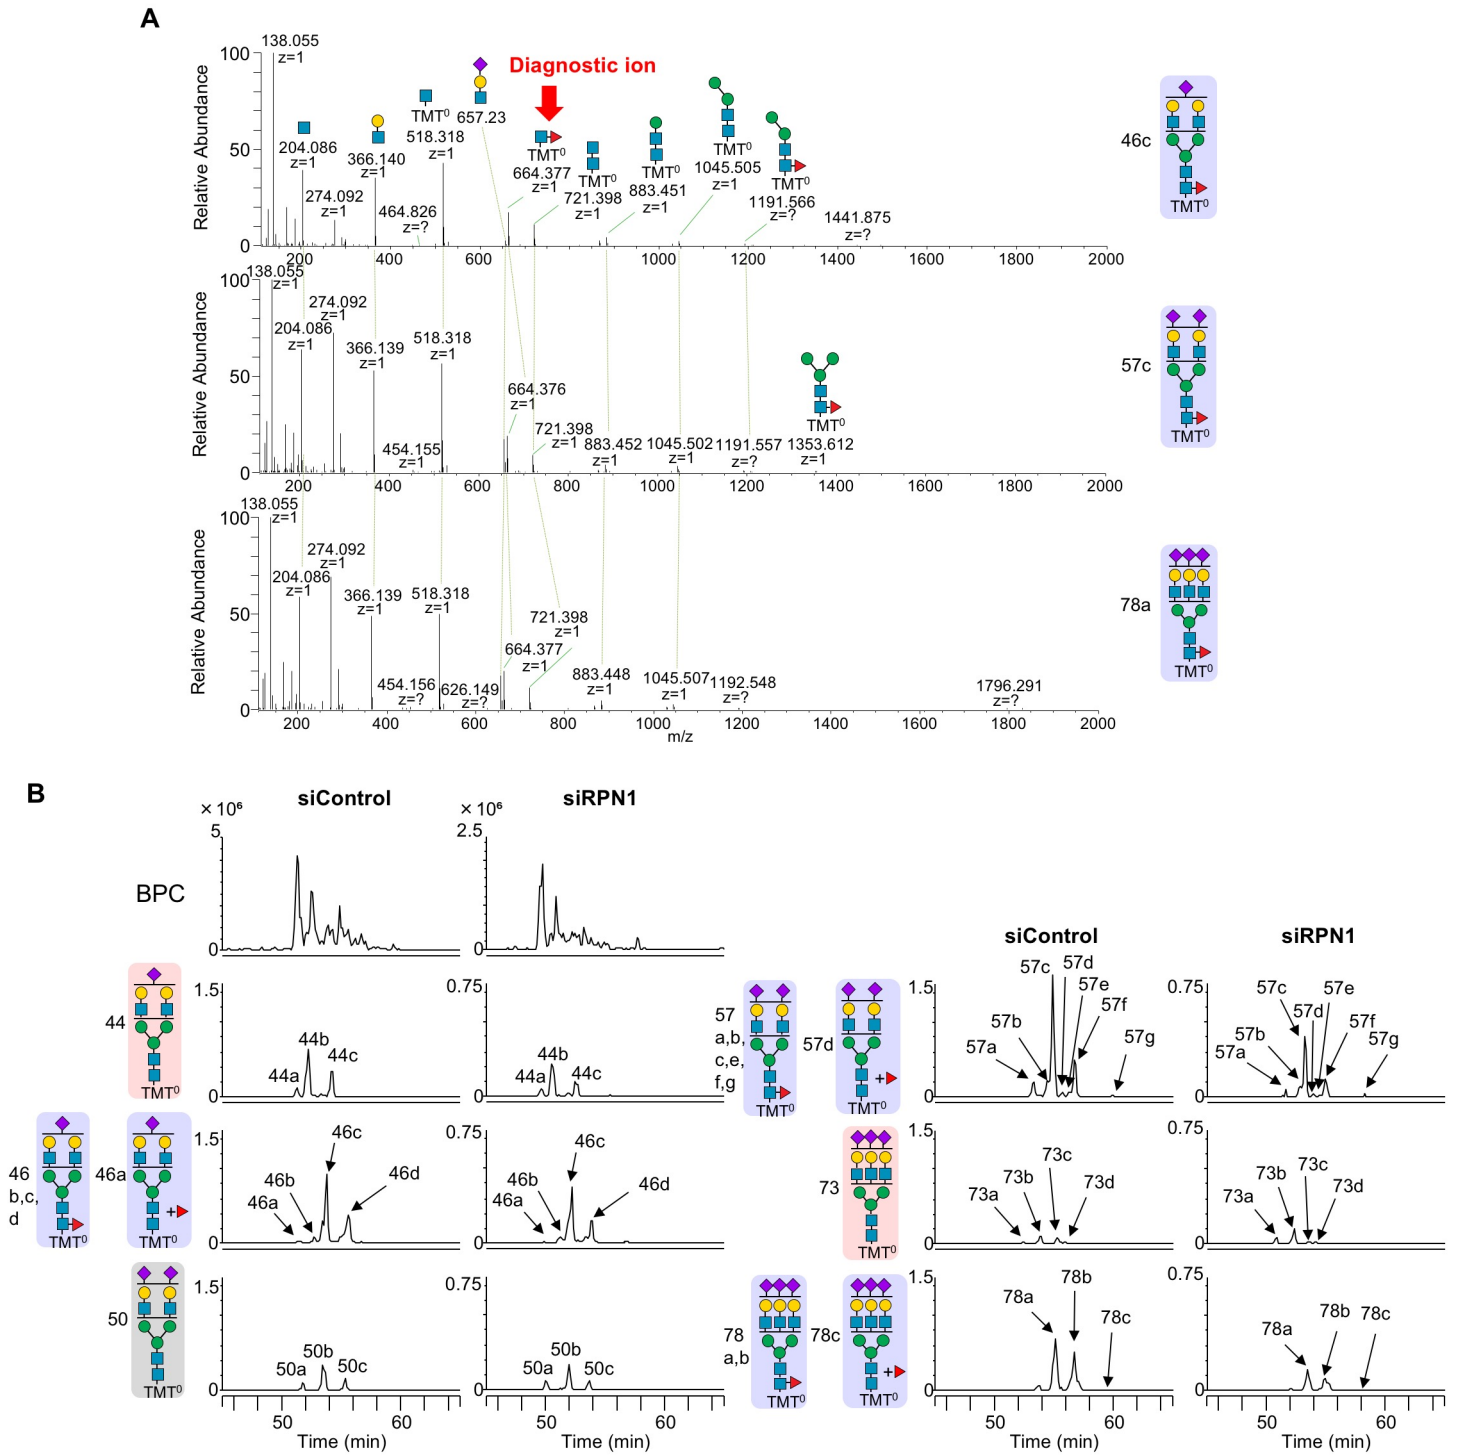

**Supplemental Fig. S5. LC-MS analysis of *N*-glycans from siRPN1-treated HEK293 cells. (A) MS/MS analysis of the representative core-fucosylated *N*-glycans from HEK293 cells treated with siControl. The diagnostic ions for core fucose structure are indicated. (B) Extracted ion chromatograms (EICs) of the major non-fucosylated and fucosylated *N*-glycans shown in Fig. 6C.**

# Figure S6

Image data of Western blotting used in the figures

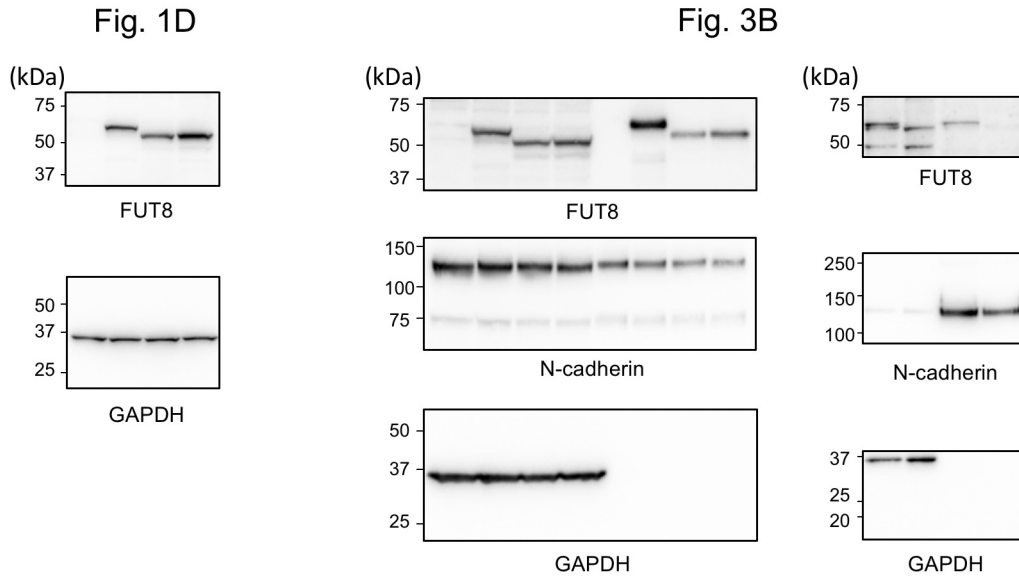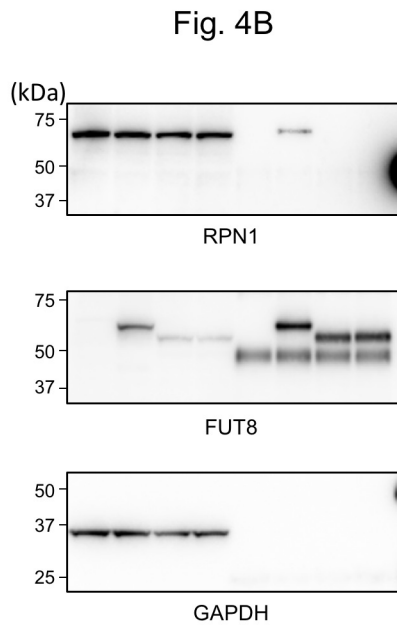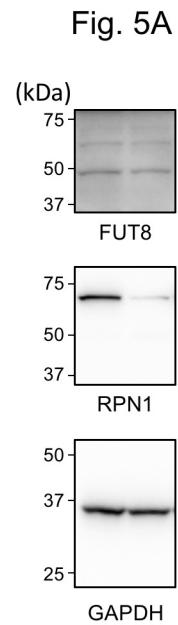

# Supplemental Table S1

Precursor ions with a diagnostic ion for core fucose were indicated in yellow.

| No. | glycoform mass | calculated mass ( $\Delta$ 10 ppm) |                     |                     |                     | structure | Charge                                            | 190110608  | 19110609              | 190110608  | 19110609 |       |
|-----|----------------|------------------------------------|---------------------|---------------------|---------------------|-----------|---------------------------------------------------|------------|-----------------------|------------|----------|-------|
|     |                | [M+H]                              | [M+2H] <sup>2</sup> | [M+3H] <sup>3</sup> | [M+4H] <sup>4</sup> |           |                                                   | HEK293_    | HEK293_               | HEK293_    | HEK293_  |       |
|     |                |                                    |                     |                     |                     |           |                                                   | siControl_ | siRPN1_               | siControl_ | siRPN1_  |       |
|     |                |                                    |                     |                     |                     |           | TMT0                                              | TMT0       | TMT0                  | TMT0       |          |       |
|     |                |                                    |                     |                     |                     |           | peak intensity in EIC                             |            | relative abundance(%) |            |          |       |
| 1   | a              | 1216.423                           | 1531.663            | 766.335             | 511.226             | 383.672   | (Hex)2 + (Man)3(GlcNAc)2                          | 1          | 39795                 | 16823      | 0.13     | 0.10  |
|     | b              |                                    |                     |                     |                     |           |                                                   |            | 22245                 | 5710       | 0.07     | 0.03  |
|     | c              |                                    |                     |                     |                     |           |                                                   |            | 48658                 | 35764      | 0.16     | 0.21  |
| 2   | a              | 1378.476                           | 1693.716            | 847.362             | 565.244             | 424.185   | (Hex)3 + (Man)3(GlcNAc)2                          | 2          | 279454                | 133512     | 0.90     | 0.79  |
|     | b              |                                    |                     |                     |                     |           |                                                   |            | 2661525               | 1197631    | 8.57     | 7.07  |
|     | c              |                                    |                     |                     |                     |           |                                                   |            | 50365                 | 96731      | 0.16     | 0.57  |
| 3   | a              | 1540.528                           | 1855.768            | 928.388             | 619.261             | 464.698   | (Hex)4 + (Man)3(GlcNAc)2                          | 2          | 46035                 | 18010      | 0.15     | 0.11  |
|     | b              |                                    |                     |                     |                     |           |                                                   |            | 1454631               | 577197     | 4.68     | 3.41  |
|     | c              |                                    |                     |                     |                     |           |                                                   |            | 832863                | 370020     | 2.68     | 2.18  |
| 4   | a              | 1702.581                           | 2017.821            | 1009.414            | 673.279             | 505.211   | (Hex)5 + (Man)3(GlcNAc)2                          | 2          | 118225                | 59198      | 0.38     | 0.35  |
|     | b              |                                    |                     |                     |                     |           |                                                   |            | 4210995               | 1405139    | 13.56    | 8.29  |
|     | c              |                                    |                     |                     |                     |           |                                                   |            | 92626                 | 54187      | 0.30     | 0.32  |
| 5   | a              | 1864.634                           | 2179.874            | 1090.441            | 727.296             | 545.724   | (Hex)6 + (Man)3(GlcNAc)2                          | 2          | 143221                | 91173      | 0.46     | 0.54  |
|     | b              |                                    |                     |                     |                     |           |                                                   |            | 3831980               | 1897655    | 12.34    | 11.20 |
|     | c              |                                    |                     |                     |                     |           |                                                   |            | 23618                 | 14562      | 0.08     | 0.09  |
| 6   | a              | 2026.687                           | 2341.927            | 1171.467            | 781.314             | 586.238   | (Hex)7 + (Man)3(GlcNAc)2                          | 2          | 388514                | 285632     | 1.25     | 1.69  |
|     | b              |                                    |                     |                     |                     |           |                                                   |            | 0                     | 25816      | 0.00     | 0.15  |
|     | c              |                                    |                     |                     |                     |           |                                                   |            | 0                     | 54574      | 0.00     | 0.32  |
| 7   | a              | 892.317                            | 1207.557            | 604.282             | 403.191             | 302.645   | (Hex)3(HexNAc)2                                   | 1          | 0                     | 56681      | 0.00     | 0.33  |
|     | b              |                                    |                     |                     |                     |           |                                                   |            | 28586                 | 16082      | 0.09     | 0.09  |
|     | c              |                                    |                     |                     |                     |           |                                                   |            | 18913                 | 10233      | 0.06     | 0.06  |
|     | d              |                                    |                     |                     |                     |           |                                                   |            | 33723                 | 14329      | 0.11     | 0.08  |
|     | e              |                                    |                     |                     |                     |           |                                                   |            | 21158                 | 6779       | 0.07     | 0.04  |
|     | f              |                                    |                     |                     |                     |           |                                                   |            | 23497                 | 32461      | 0.08     | 0.19  |
|     | g              |                                    |                     |                     |                     |           |                                                   |            | 33052                 | 62341      | 0.11     | 0.37  |
| 8   | a              | 1038.375                           | 1353.615            | 677.311             | 451.877             | 339.160   | (Hex)3 (HexNAc)2 (Deoxyhexose)1                   | 1          | 17002                 | 7808       | 0.05     | 0.05  |
|     | b              |                                    |                     |                     |                     |           |                                                   |            | 15868                 | 10121      | 0.05     | 0.06  |
|     | c              |                                    |                     |                     |                     |           |                                                   |            | 23272                 | 7191       | 0.07     | 0.04  |
| 9   | a              | 1257.449                           | 1572.689            | 786.848             | 524.901             | 393.928   | (Hex)1 (HexNAc)1 + (Man)3(GlcNAc)2                | 1          | 49614                 | 122000     | 0.16     | 0.72  |
|     | b              |                                    |                     |                     |                     |           |                                                   |            | 0                     | 23015      | 0.00     | 0.14  |
|     | c              |                                    |                     |                     |                     |           |                                                   |            | 0                     | 29653      | 0.00     | 0.17  |
| 10  | a              | 1298.476                           | 1613.716            | 807.362             | 538.577             | 404.185   | (HexNAc)2 + (Man)3(GlcNAc)2                       | 2          | 6001                  | 3609       | 0.02     | 0.02  |
|     | b              |                                    |                     |                     |                     |           |                                                   |            | 439888                | 388284     | 1.42     | 2.29  |
|     | c              |                                    |                     |                     |                     |           |                                                   |            | 46766                 | 11819      | 0.15     | 0.07  |
| 11  | a              | 1419.502                           | 1734.742            | 867.875             | 578.919             | 434.441   | (Hex)2 (HexNAc)1 + (Man)3(GlcNAc)2                | 2          | 18535                 | 5829       | 0.06     | 0.03  |
|     | b              |                                    |                     |                     |                     |           |                                                   |            | 39015                 | 20628      | 0.13     | 0.12  |
|     | c              |                                    |                     |                     |                     |           |                                                   |            | 0                     | 117090     | 0.00     | 0.69  |
|     | d              |                                    |                     |                     |                     |           |                                                   |            | 0                     | 14922      | 0.00     | 0.09  |
|     | e              |                                    |                     |                     |                     |           |                                                   |            | 4090                  | 18917      | 0.01     | 0.11  |
|     | f              |                                    |                     |                     |                     |           |                                                   |            | 2993                  | 11935      | 0.01     | 0.07  |
| 12  | a              | 1460.529                           | 1775.769            | 888.388             | 592.595             | 444.698   | (Hex)1 (HexNAc)2 + (Man)3(GlcNAc)2                | 2          | 6548                  | 52091      | 0.02     | 0.31  |
|     | b              |                                    |                     |                     |                     |           |                                                   |            | 11748                 | 20033      | 0.04     | 0.12  |
|     | c              |                                    |                     |                     |                     |           |                                                   |            | 0                     | 16299      | 0.00     | 0.10  |
| 13  | a              | 1501.555                           | 1816.795            | 908.901             | 606.270             | 454.955   | (HexNAc)3 + (Man)3(GlcNAc)2                       | 2          | 33326                 | 15078      | 0.11     | 0.09  |
|     | b              |                                    |                     |                     |                     |           |                                                   |            | 1074270               | 360583     | 3.46     | 2.13  |
|     | c              |                                    |                     |                     |                     |           |                                                   |            | 36433                 | 9910       | 0.12     | 0.06  |
| 14  | a              | 1622.582                           | 1937.822            | 969.415             | 646.612             | 485.211   | (Hex)2 (HexNAc)2 + (Man)3(GlcNAc)2                | 2          | 19695                 | 5564       | 0.06     | 0.03  |
|     | b              |                                    |                     |                     |                     |           |                                                   |            | 44838                 | 27830      | 0.14     | 0.16  |
|     | c              |                                    |                     |                     |                     |           |                                                   |            | 433215                | 219533     | 1.39     | 1.30  |
|     | d              |                                    |                     |                     |                     |           |                                                   |            | 49003                 | 19065      | 0.16     | 0.11  |
|     | e              |                                    |                     |                     |                     |           |                                                   |            | 13180                 | 25253      | 0.04     | 0.15  |
|     | f              |                                    |                     |                     |                     |           |                                                   |            | 6721                  | 12083      | 0.02     | 0.07  |
| 15  | a              | 1663.608                           | 1978.848            | 989.928             | 660.288             | 495.468   | (Hex)1 (HexNAc)3 + (Man)3(GlcNAc)2                | 2          | 44156                 | 19959      | 0.14     | 0.12  |
|     | b              |                                    |                     |                     |                     |           |                                                   |            | 0                     | 35622      | 0.00     | 0.21  |
|     | c              |                                    |                     |                     |                     |           |                                                   |            | 26688                 | 14476      | 0.09     | 0.09  |
|     | d              |                                    |                     |                     |                     |           |                                                   |            | 0                     | 18606      | 0.00     | 0.11  |
|     | e              |                                    |                     |                     |                     |           |                                                   |            | 0                     | 4912       | 0.00     | 0.03  |
|     | f              |                                    |                     |                     |                     |           |                                                   |            | 0                     | 7809       | 0.00     | 0.05  |
| 16  | a              | 1825.661                           | 2140.901            | 1070.954            | 714.305             | 535.981   | (Hex)2 (HexNAc)3 + (Man)3(GlcNAc)2                | 2          | 66517                 | 0          | 0.21     | 0.00  |
|     | b              |                                    |                     |                     |                     |           |                                                   |            | 7065                  | 20411      | 0.02     | 0.12  |
|     | c              |                                    |                     |                     |                     |           |                                                   |            | 0                     | 22626      | 0.00     | 0.13  |
| 17  | a              | 2190.793                           | 2506.033            | 1253.520            | 836.016             | 627.264   | (Hex)3 (HexNAc)4 + (Man)3(GlcNAc)2                | 3          | 10107                 | 5864       | 0.03     | 0.03  |
|     | b              |                                    |                     |                     |                     |           |                                                   |            | 28407                 | 4751       | 0.09     | 0.03  |
|     | c              |                                    |                     |                     |                     |           |                                                   |            | 14608                 | 72256      | 0.05     | 0.43  |
| 18  | a              | 1241.455                           | 1556.695            | 778.851             | 519.570             | 389.930   | (HexNAc)1 (Deoxyhexose)1 + (Man)3(GlcNAc)2        | 1          | 19505                 | 14737      | 0.06     | 0.09  |
|     | b              |                                    |                     |                     |                     |           |                                                   |            | 14616                 | 8823       | 0.05     | 0.05  |
|     | c              |                                    |                     |                     |                     |           |                                                   |            | 25295                 | 19584      | 0.08     | 0.12  |
|     | d              |                                    |                     |                     |                     |           |                                                   |            | 18146                 | 8456       | 0.06     | 0.05  |
|     | e              |                                    |                     |                     |                     |           |                                                   |            | 5798                  | 4522       | 0.02     | 0.03  |
|     | f              |                                    |                     |                     |                     |           |                                                   |            | 8216                  | 16495      | 0.03     | 0.10  |
| 19  | a              | 1362.481                           | 1677.721            | 839.364             | 559.912             | 420.186   | (Hex)2 (Deoxyhexose)1 + (Man)3(GlcNAc)2           | 2          | 6896                  | 9934       | 0.02     | 0.06  |
|     | b              |                                    |                     |                     |                     |           |                                                   |            | 32531                 | 39844      | 0.10     | 0.24  |
|     | c              |                                    |                     |                     |                     |           |                                                   |            | 2675                  | 8573       | 0.01     | 0.05  |
| 20  | a              | 1403.507                           | 1718.747            | 859.877             | 573.587             | 430.443   | (Hex)1 (HexNAc)1 (Deoxyhexose)1 + (Man)3(GlcNAc)2 | 2          | 111182                | 86633      | 0.36     | 0.51  |
|     | b              |                                    |                     |                     |                     |           |                                                   |            | 131502                | 67508      | 0.42     | 0.40  |
|     | c              |                                    |                     |                     |                     |           |                                                   |            | 102459                | 30893      | 0.33     | 0.18  |
|     | d              |                                    |                     |                     |                     |           |                                                   |            | 43142                 | 50626      | 0.14     | 0.30  |
|     | e              |                                    |                     |                     |                     |           |                                                   |            | 267215                | 268366     | 0.86     | 1.58  |
|     | f              |                                    |                     |                     |                     |           |                                                   |            | 31890                 | 34798      | 0.10     | 0.21  |
| 21  | a              | 1444.534                           | 1759.774            | 880.391             | 587.263             | 440.699   | (HexNAc)2 (Deoxyhexose)1 + (Man)3(GlcNAc)2        | 2          | 13536                 | 17707      | 0.04     | 0.10  |
|     | b              |                                    |                     |                     |                     |           |                                                   |            | 286414                | 229030     | 0.92     | 1.35  |
|     | c              |                                    |                     |                     |                     |           |                                                   |            | 18038                 | 40930      | 0.06     | 0.24  |
|     | d              |                                    |                     |                     |                     |           |                                                   |            | 18714                 | 49719      | 0.06     | 0.29  |

|    |   |          |          |          |         |         |                                                            |   |        |        |      |      |
|----|---|----------|----------|----------|---------|---------|------------------------------------------------------------|---|--------|--------|------|------|
| 23 | a | 1565.560 | 1880.800 | 940.904  | 627.605 | 470.956 | (Hex)2 (HexNAc)1 (Deoxyhexose)1 + (Man)3(GlcNAc)2          | 2 | 20009  | 5381   | 0.06 | 0.03 |
|    | b |          |          |          |         |         |                                                            |   | 969104 | 243126 | 3.12 | 1.43 |
| 24 | a | 1606.587 | 1921.827 | 961.417  | 641.281 | 481.213 | (Hex)1 (HexNAc)2 (Deoxyhexose)1 + (Man)3(GlcNAc)2          | 2 | 34421  | 16526  | 0.11 | 0.10 |
|    | b |          |          |          |         |         |                                                            |   | 117979 | 344626 | 0.38 | 2.03 |
|    | c |          |          |          |         |         |                                                            |   | 33232  | 28922  | 0.11 | 0.17 |
|    | d |          |          |          |         |         |                                                            |   | 26488  | 57068  | 0.09 | 0.34 |
|    | e |          |          |          |         |         |                                                            |   | 20132  | 29270  | 0.06 | 0.17 |
|    | f |          |          |          |         |         |                                                            |   | 16458  | 20264  | 0.05 | 0.12 |
| 25 | a | 1647.613 | 1962.853 | 981.930  | 654.956 | 491.469 | (HexNAc)3 (Deoxyhexose)1 + (Man)3(GlcNAc)2                 | 2 | 34917  | 56789  | 0.11 | 0.34 |
|    | b |          |          |          |         |         |                                                            |   | 21712  | 24851  | 0.07 | 0.15 |
| 26 | a | 1727.613 | 2042.853 | 1021.930 | 681.623 | 511.469 | (Hex)3 (HexNAc)1 (Deoxyhexose)1 + (Man)3(GlcNAc)2          | 2 | 28880  | 13451  | 0.09 | 0.08 |
|    | b |          |          |          |         |         |                                                            |   | 16577  | 6461   | 0.05 | 0.04 |
| 27 | c | 1768.640 | 2083.880 | 1042.444 | 695.298 | 521.726 | (Hex)2 (HexNAc)2 (Deoxyhexose)1 + (Man)3(GlcNAc)2          | 2 | 348416 | 117892 | 1.12 | 0.70 |
|    | d |          |          |          |         |         |                                                            |   | 23265  | 13535  | 0.07 | 0.08 |
|    | e |          |          |          |         |         |                                                            |   | 18741  | 0      | 0.06 | 0.00 |
|    | f |          |          |          |         |         |                                                            |   | 366104 | 291987 | 1.18 | 1.72 |
|    | g |          |          |          |         |         |                                                            |   | 51119  | 28702  | 0.16 | 0.17 |
|    | h |          |          |          |         |         |                                                            |   | 33760  | 42457  | 0.11 | 0.25 |
| 28 | a | 1809.666 | 2124.906 | 1062.957 | 708.974 | 531.982 | (Hex)1 (HexNAc)3 (Deoxyhexose)1 + (Man)3(GlcNAc)2          | 2 | 20769  | 22994  | 0.07 | 0.14 |
|    | b |          |          |          |         |         |                                                            |   | 14044  | 13155  | 0.05 | 0.08 |
|    | c |          |          |          |         |         |                                                            |   | 10689  | 58695  | 0.03 | 0.35 |
|    | d |          |          |          |         |         |                                                            |   | 0      | 19478  | 0.00 | 0.11 |
|    | e |          |          |          |         |         |                                                            |   | 69719  | 42664  | 0.22 | 0.25 |
|    | f |          |          |          |         |         |                                                            |   | 0      | 33743  | 0.00 | 0.20 |
|    | g |          |          |          |         |         |                                                            |   | 0      | 7613   | 0.00 | 0.04 |
| 29 | a | 1850.693 | 2165.933 | 1083.470 | 722.649 | 542.239 | (HexNAc)4 (Deoxyhexose)1 + (Man)3(GlcNAc)2                 | 2 | 0      | 9078   | 0.00 | 0.05 |
|    | b |          |          |          |         |         |                                                            |   | 35782  | 57053  | 0.12 | 0.34 |
| 30 | a | 1930.692 | 2245.932 | 1123.470 | 749.316 | 562.239 | (Hex)3 (HexNAc)2 (Deoxyhexose)1 + (Man)3(GlcNAc)2          | 2 | 102136 | 36091  | 0.33 | 0.21 |
| 31 | a | 1971.719 | 2286.959 | 1143.983 | 762.991 | 572.496 | (Hex)2 (HexNAc)3 (Deoxyhexose)1 + (Man)3(GlcNAc)2          | 2 | 214893 | 35250  | 0.69 | 0.21 |
|    | b |          |          |          |         |         |                                                            |   | 22078  | 45435  | 0.07 | 0.27 |
|    | c |          |          |          |         |         |                                                            |   | 0      | 36569  | 0.00 | 0.22 |
|    | d |          |          |          |         |         |                                                            |   | 40060  | 60892  | 0.13 | 0.36 |
| 32 | a | 1987.714 | 2302.954 | 1151.981 | 768.323 | 576.494 | (Hex)3 (HexNAc)3 + (Man)3(GlcNAc)2                         | 2 | 21837  | 19294  | 0.07 | 0.11 |
|    | b |          |          |          |         |         |                                                            |   | 41295  | 26837  | 0.13 | 0.16 |
|    | c |          |          |          |         |         |                                                            |   | 26820  | 17391  | 0.09 | 0.10 |
|    | d |          |          |          |         |         |                                                            |   | 19490  | 13598  | 0.06 | 0.08 |
|    | e |          |          |          |         |         |                                                            |   | 8941   | 4247   | 0.03 | 0.03 |
| 33 | a | 2133.772 | 2449.012 | 1225.010 | 817.009 | 613.009 | (Hex)3 (HexNAc)3 (Deoxyhexose)1 + (Man)3(GlcNAc)2          | 3 | 188706 | 215501 | 0.61 | 1.27 |
|    | b |          |          |          |         |         |                                                            |   | 237730 | 109579 | 0.77 | 0.65 |
|    | c |          |          |          |         |         |                                                            |   | 38826  | 26153  | 0.13 | 0.15 |
| 34 | a | 2174.798 | 2490.038 | 1245.523 | 830.684 | 623.265 | (Hex)2 (HexNAc)4 (Deoxyhexose)1 + (Man)3(GlcNAc)2          | 3 | 16805  | 12256  | 0.05 | 0.07 |
|    | b |          |          |          |         |         |                                                            |   | 13145  | 11823  | 0.04 | 0.07 |
|    | c |          |          |          |         |         |                                                            |   | 28619  | 83128  | 0.09 | 0.49 |
|    | d |          |          |          |         |         |                                                            |   | 16341  | 167498 | 0.05 | 0.99 |
| 35 | a | 2336.851 | 2652.091 | 1326.549 | 884.702 | 663.779 | (Hex)3 (HexNAc)4 (Deoxyhexose)1 + (Man)3(GlcNAc)2          | 3 | 40910  | 14302  | 0.13 | 0.08 |
|    | b |          |          |          |         |         |                                                            |   | 65619  | 15556  | 0.21 | 0.09 |
|    | c |          |          |          |         |         |                                                            |   | 101175 | 158504 | 0.33 | 0.94 |
| 36 | a | 2498.904 | 2814.144 | 1407.576 | 938.720 | 704.292 | (Hex)4 (HexNAc)4 (Deoxyhexose)1 + (Man)3(GlcNAc)2          | 3 | 420602 | 253828 | 1.35 | 1.50 |
|    | b |          |          |          |         |         |                                                            |   | 13822  | 6072   | 0.04 | 0.04 |
| 37 | a | 1548.545 | 1863.785 | 932.396  | 621.933 | 466.702 | (Hex)1 (HexNAc)1 (NeuAc)1 + (Man)3(GlcNAc)2                | 2 | 77722  | 72142  | 0.25 | 0.43 |
|    | b |          |          |          |         |         |                                                            |   | 18529  | 9697   | 0.06 | 0.06 |
|    | c |          |          |          |         |         |                                                            |   | 76315  | 31657  | 0.25 | 0.19 |
|    | d |          |          |          |         |         |                                                            |   | 0      | 12746  | 0.00 | 0.08 |
|    | e |          |          |          |         |         |                                                            |   | 13765  | 17374  | 0.04 | 0.10 |
| 38 | a | 1694.603 | 2009.843 | 1005.425 | 670.619 | 503.217 | (Hex)1 (HexNAc)1 (Deoxyhexose)1 (NeuAc)1 + (Man)3(GlcNAc)2 | 2 | 22422  | 4973   | 0.07 | 0.03 |
|    | b |          |          |          |         |         |                                                            |   | 231734 | 161612 | 0.75 | 0.95 |
|    | c |          |          |          |         |         |                                                            |   | 72277  | 40616  | 0.23 | 0.24 |
|    | d |          |          |          |         |         |                                                            |   | 33264  | 56351  | 0.11 | 0.33 |
|    | e |          |          |          |         |         |                                                            |   | 48319  | 53509  | 0.16 | 0.32 |
| 39 | a | 1710.598 | 2025.838 | 1013.423 | 675.951 | 507.215 | (Hex)2 (HexNAc)1 (NeuAc)1 + (Man)3(GlcNAc)2                | 2 | 6626   | 5334   | 0.02 | 0.03 |
|    | b |          |          |          |         |         |                                                            |   | 337635 | 99358  | 1.09 | 0.59 |
|    | c |          |          |          |         |         |                                                            |   | 284327 | 80037  | 0.92 | 0.47 |
| 40 | a | 1751.624 | 2066.864 | 1033.936 | 689.626 | 517.472 | (Hex)1 (HexNAc)2 (NeuAc)1 + (Man)3(GlcNAc)2                | 2 | 0      | 14528  | 0.00 | 0.09 |
|    | b |          |          |          |         |         |                                                            |   | 33294  | 86081  | 0.11 | 0.51 |
|    | c |          |          |          |         |         |                                                            |   | 0      | 13474  | 0.00 | 0.08 |
| 41 | a | 1856.656 | 2171.896 | 1086.452 | 724.637 | 543.730 | (Hex)2 (HexNAc)1 (Deoxyhexose)1 (NeuAc)1 + (Man)3(GlcNAc)2 | 2 | 246731 | 124566 | 0.79 | 0.73 |
|    | b |          |          |          |         |         |                                                            |   | 274943 | 74212  | 0.89 | 0.44 |
| 42 | a | 1872.650 | 2187.890 | 1094.449 | 729.968 | 547.728 | (Hex)3 (HexNAc)1 (NeuAc)1 + (Man)3(GlcNAc)2                | 2 | 11939  | 9743   | 0.04 | 0.06 |
|    | b |          |          |          |         |         |                                                            |   | 394009 | 191951 | 1.27 | 1.13 |
|    | c |          |          |          |         |         |                                                            |   | 424980 | 133987 | 1.37 | 0.79 |
| 43 | a | 1897.682 | 2212.922 | 1106.965 | 738.312 | 553.986 | (Hex)1 (HexNAc)2 (Deoxyhexose)1 (NeuAc)1 + (Man)3(GlcNAc)2 | 2 | 20819  | 22442  | 0.07 | 0.13 |
|    | b |          |          |          |         |         |                                                            |   | 93409  | 150606 | 0.30 | 0.89 |
|    | c |          |          |          |         |         |                                                            |   | 14267  | 17660  | 0.05 | 0.10 |
|    | d |          |          |          |         |         |                                                            |   | 40084  | 77265  | 0.13 | 0.46 |
| 44 | a | 1913.677 | 2228.917 | 1114.962 | 743.644 | 557.985 | (Hex)2 (HexNAc)2 (NeuAc)1 + (Man)3(GlcNAc)2                | 2 | 99752  | 53129  | 0.32 | 0.31 |
|    | b |          |          |          |         |         |                                                            |   | 640255 | 217667 | 2.06 | 1.28 |
|    | c |          |          |          |         |         |                                                            |   | 345954 | 100159 | 1.11 | 0.59 |
| 45 | a | 2018.708 | 2333.948 | 1167.478 | 778.654 | 584.243 | (Hex)3 (HexNAc)1 (Deoxyhexose)1 (NeuAc)1 + (Man)3(GlcNAc)2 | 2 | 127021 | 53809  | 0.41 | 0.32 |
|    | b |          |          |          |         |         |                                                            |   | 125875 | 32500  | 0.41 | 0.19 |
|    | c |          |          |          |         |         |                                                            |   | 38386  | 13888  | 0.12 | 0.08 |
| 46 | a | 2059.735 | 2374.975 | 1187.991 | 792.330 | 594.500 | (Hex)2 (HexNAc)2 (Deoxyhexose)1 (NeuAc)1 + (Man)3(GlcNAc)2 | 2 | 79566  | 47006  | 0.26 | 0.28 |
|    | b |          |          |          |         |         |                                                            |   | 927949 | 371282 | 2.99 | 2.19 |
|    | c |          |          |          |         |         |                                                            |   | 375456 | 155371 | 1.21 | 0.92 |
|    | d |          |          |          |         |         |                                                            |   | 5560   | 6904   | 0.02 | 0.04 |
| 47 | a | 2100.762 | 2416.002 | 1208.505 | 806.006 | 604.756 | (Hex)1 (HexNAc)3 (Deoxyhexose)1 (NeuAc)1 + (Man)3(GlcNAc)2 | 3 | 27175  | 12091  | 0.09 | 0.07 |
|    | b |          |          |          |         |         |                                                            |   | 38769  | 82267  | 0.12 | 0.49 |
|    | c |          |          |          |         |         |                                                            |   | 194230 | 127726 | 0.63 | 0.75 |
|    | d |          |          |          |         |         |                                                            |   | 81173  | 41433  | 0.26 | 0.24 |
|    | e |          |          |          |         |         |                                                            |   |        |        |      |      |







|    |   |          |          |          |          |         |                                                            |   |        |        |      |      |
|----|---|----------|----------|----------|----------|---------|------------------------------------------------------------|---|--------|--------|------|------|
| 66 | b | 2569.905 | 2885.145 | 1443.076 | 962.387  | 722.042 | (Hex)3 (HexNAc)3 (NeuAc)2 + (Man)3(GlcNAc)2                | 3 | 16852  | 6390   | 0.05 | 0.04 |
|    | c |          |          |          |          |         |                                                            |   | 387579 | 79351  | 1.25 | 0.47 |
|    | d |          |          |          |          |         |                                                            |   | 105918 | 36274  | 0.34 | 0.21 |
|    | e |          |          |          |          |         |                                                            |   | 403630 | 124944 | 1.30 | 0.74 |
| 67 | a | 2586.920 | 2902.160 | 1451.584 | 968.058  | 726.296 | (Hex)4 (HexNAc)3 (Deoxyhexose)1 (NeuAc)1 + (Man)3(GlcNAc)2 | 3 | 10239  | 6139   | 0.03 | 0.04 |
|    | b |          |          |          |          |         |                                                            |   | 3391   | 3602   | 0.01 | 0.02 |
| 68 | a | 2627.947 | 2943.187 | 1472.097 | 981.734  | 736.553 | (Hex)3 (HexNAc)4 (Deoxyhexose)1 (NeuAc)1 + (Man)3(GlcNAc)2 | 3 | 17405  | 10454  | 0.06 | 0.06 |
|    | b |          |          |          |          |         |                                                            |   | 176894 | 88961  | 0.57 | 0.52 |
|    | c |          |          |          |          |         |                                                            |   | 40404  | 82164  | 0.13 | 0.48 |
|    | d |          |          |          |          |         |                                                            |   | 26387  | 35583  | 0.08 | 0.21 |
| 69 | a | 2643.941 | 2959.181 | 1480.094 | 987.065  | 740.551 | (Hex)4 (HexNAc)4 (NeuAc)1 + (Man)3(GlcNAc)2                | 3 | 137455 | 68749  | 0.44 | 0.41 |
|    | b |          |          |          |          |         |                                                            |   | 49141  | 57840  | 0.16 | 0.34 |
|    | c |          |          |          |          |         |                                                            |   | 81686  | 61087  | 0.26 | 0.36 |
|    | d |          |          |          |          |         |                                                            |   | 22072  | 18298  | 0.07 | 0.11 |
|    | e |          |          |          |          |         |                                                            |   | 7196   | 7956   | 0.02 | 0.05 |
| 70 | a | 2715.963 | 3031.203 | 1516.105 | 1011.073 | 758.557 | (Hex)3 (HexNAc)3 (Deoxyhexose)1 (NeuAc)2 + (Man)3(GlcNAc)2 | 3 | 793752 | 271653 | 2.56 | 1.60 |
|    | b |          |          |          |          |         |                                                            |   | 148544 | 74866  | 0.48 | 0.44 |
|    | c |          |          |          |          |         |                                                            |   | 642751 | 198671 | 2.07 | 1.17 |
|    | d |          |          |          |          |         |                                                            |   | 82187  | 22858  | 0.26 | 0.13 |
|    | e |          |          |          |          |         |                                                            |   | 26301  | 9038   | 0.08 | 0.05 |
|    | f |          |          |          |          |         |                                                            |   | 8215   | 6461   | 0.03 | 0.04 |
| 71 | a | 2756.989 | 3072.229 | 1536.618 | 1024.748 | 768.813 | (Hex)2 (HexNAc)4 (Deoxyhexose)1 (NeuAc)2 + (Man)3(GlcNAc)2 | 3 | 5099   | 4959   | 0.02 | 0.03 |
|    | b |          |          |          |          |         |                                                            |   | 16302  | 32275  | 0.05 | 0.19 |
|    | c |          |          |          |          |         |                                                            |   | 21788  | 31654  | 0.07 | 0.19 |
| 72 | a | 2789.999 | 3105.239 | 1553.123 | 1035.751 | 777.066 | (Hex)4 (HexNAc)4 (Deoxyhexose)1 (NeuAc)1 + (Man)3(GlcNAc)2 | 3 | 5697   | 13800  | 0.02 | 0.08 |
|    | b |          |          |          |          |         |                                                            |   | 248240 | 149958 | 0.80 | 0.88 |
|    | c |          |          |          |          |         |                                                            |   | 282815 | 176876 | 0.91 | 1.04 |
|    | d |          |          |          |          |         |                                                            |   | 347546 | 148913 | 1.12 | 0.88 |
|    | e |          |          |          |          |         |                                                            |   | 82337  | 49523  | 0.27 | 0.29 |
|    | f |          |          |          |          |         |                                                            |   | 21198  | 14274  | 0.07 | 0.08 |
| 73 | a | 2861.000 | 3176.240 | 1588.624 | 1059.418 | 794.816 | (Hex)3 (HexNAc)3 (NeuAc)3 + (Man)3(GlcNAc)2                | 3 | 33211  | 39875  | 0.11 | 0.24 |
|    | b |          |          |          |          |         |                                                            |   | 110043 | 97429  | 0.35 | 0.57 |
|    | c |          |          |          |          |         |                                                            |   | 78732  | 18072  | 0.25 | 0.11 |
|    | d |          |          |          |          |         |                                                            |   | 36779  | 137751 | 0.12 | 0.81 |
| 74 | a | 2878.015 | 3193.255 | 1597.131 | 1065.090 | 799.070 | (Hex)4 (HexNAc)3 (Deoxyhexose)1 (NeuAc)2 + (Man)3(GlcNAc)2 | 3 | 10665  | 10790  | 0.03 | 0.06 |
|    | b |          |          |          |          |         |                                                            |   | 28213  | 5299   | 0.09 | 0.03 |
|    | c |          |          |          |          |         |                                                            |   | 13659  | 3795   | 0.04 | 0.02 |
| 75 | a | 2919.042 | 3234.282 | 1617.645 | 1078.766 | 809.326 | (Hex)3 (HexNAc)4 (Deoxyhexose)1 (NeuAc)2 + (Man)3(GlcNAc)2 | 3 | 80790  | 10922  | 0.26 | 0.06 |
|    | b |          |          |          |          |         |                                                            |   | 68417  | 65483  | 0.22 | 0.39 |
|    | c |          |          |          |          |         |                                                            |   | 56313  | 54320  | 0.18 | 0.32 |
|    | d |          |          |          |          |         |                                                            |   | 10219  | 10754  | 0.03 | 0.06 |
|    | e |          |          |          |          |         |                                                            |   | 14108  | 20269  | 0.05 | 0.12 |
|    | f |          |          |          |          |         |                                                            |   | 13573  | 14333  | 0.04 | 0.08 |
|    | g |          |          |          |          |         |                                                            |   | 7427   | 8913   | 0.02 | 0.05 |
| 76 | a | 2935.037 | 3250.277 | 1625.642 | 1084.097 | 813.325 | (Hex)4 (HexNAc)4 (NeuAc)2 + (Man)3(GlcNAc)2                | 3 | 108531 | 61466  | 0.35 | 0.36 |
|    | b |          |          |          |          |         |                                                            |   | 115423 | 69819  | 0.37 | 0.41 |
|    | c |          |          |          |          |         |                                                            |   | 43710  | 22711  | 0.14 | 0.13 |
|    | d |          |          |          |          |         |                                                            |   | 25854  | 20431  | 0.08 | 0.12 |
|    | e |          |          |          |          |         |                                                            |   | 23306  | 9965   | 0.08 | 0.06 |
| 77 | a | 2952.052 | 3267.292 | 1634.150 | 1089.769 | 817.579 | (Hex)5 (HexNAc)4 (Deoxyhexose)1 (NeuAc)1 + (Man)3(GlcNAc)2 | 3 | 6004   | 1800   | 0.02 | 0.01 |
|    | b |          |          |          |          |         |                                                            |   | 48498  | 25443  | 0.16 | 0.15 |
|    | c |          |          |          |          |         |                                                            |   | 71702  | 39808  | 0.23 | 0.23 |
|    | d |          |          |          |          |         |                                                            |   | 14754  | 7912   | 0.05 | 0.05 |
|    | e |          |          |          |          |         |                                                            |   | 7074   | 5655   | 0.02 | 0.03 |
|    | f |          |          |          |          |         |                                                            |   | 10169  | 10928  | 0.03 | 0.06 |
| 78 | a | 3007.058 | 3322.298 | 1661.653 | 1108.104 | 831.330 | (Hex)3 (HexNAc)3 (Deoxyhexose)1 (NeuAc)3 + (Man)3(GlcNAc)2 | 3 | 5827   | 4898   | 0.02 | 0.03 |
|    | b |          |          |          |          |         |                                                            |   | 696712 | 136899 | 2.24 | 0.81 |
|    | c |          |          |          |          |         |                                                            |   | 514268 | 79734  | 1.66 | 0.47 |
| 79 | a | 3081.095 | 3396.335 | 1698.671 | 1132.783 | 849.840 | (Hex)4 (HexNAc)4 (Deoxyhexose)1 (NeuAc)2 + (Man)3(GlcNAc)2 | 3 | 12084  | 4765   | 0.04 | 0.03 |
|    | b |          |          |          |          |         |                                                            |   | 500512 | 237776 | 1.61 | 1.40 |
|    | c |          |          |          |          |         |                                                            |   | 558936 | 184365 | 1.80 | 1.09 |
|    | d |          |          |          |          |         |                                                            |   | 161787 | 184365 | 0.52 | 1.09 |
|    | e |          |          |          |          |         |                                                            |   | 161787 | 69825  | 0.52 | 0.41 |
| 80 | a | 3155.132 | 3470.372 | 1735.690 | 1157.462 | 868.349 | (Hex)5 (HexNAc)5 (Deoxyhexose)1 (NeuAc)1 + (Man)3(GlcNAc)2 | 3 | 95413  | 25195  | 0.31 | 0.15 |
|    | b |          |          |          |          |         |                                                            |   | 0      | 1918   | 0.00 | 0.01 |
|    | c |          |          |          |          |         |                                                            |   | 16693  | 25043  | 0.05 | 0.15 |
|    | d |          |          |          |          |         |                                                            |   | 20781  | 20082  | 0.07 | 0.12 |
|    | e |          |          |          |          |         |                                                            |   | 21992  | 23963  | 0.07 | 0.14 |
|    | f |          |          |          |          |         |                                                            |   | 5505   | 4379   | 0.02 | 0.03 |
|    | g |          |          |          |          |         |                                                            |   | 11145  | 7527   | 0.04 | 0.04 |
| 81 | a | 3210.137 | 3525.377 | 1763.192 | 1175.797 | 882.100 | (Hex)3 (HexNAc)4 (Deoxyhexose)1 (NeuAc)3 + (Man)3(GlcNAc)2 | 3 | 8719   | 3738   | 0.03 | 0.02 |
|    | b |          |          |          |          |         |                                                            |   | 14568  | 0      | 0.05 | 0.00 |
| 82 | a | 3226.132 | 3541.372 | 1771.190 | 1181.129 | 886.099 | (Hex)4 (HexNAc)4 (NeuAc)3 + (Man)3(GlcNAc)2                | 3 | 24089  | 12634  | 0.08 | 0.07 |
|    | b |          |          |          |          |         |                                                            |   | 7842   | 8767   | 0.03 | 0.05 |
|    | c |          |          |          |          |         |                                                            |   | 67381  | 37011  | 0.22 | 0.22 |
|    | d |          |          |          |          |         |                                                            |   | 28725  | 11947  | 0.09 | 0.07 |
|    | e |          |          |          |          |         |                                                            |   | 86730  | 40498  | 0.28 | 0.24 |
| 83 | a | 3284.174 | 3599.414 | 1800.211 | 1200.476 | 900.609 | (Hex)4 (HexNAc)5 (Deoxyhexose)1 (NeuAc)2 + (Man)3(GlcNAc)2 | 3 | 8987   | 3148   | 0.03 | 0.02 |
|    | b |          |          |          |          |         |                                                            |   | 8157   | 0      | 0.03 | 0.00 |
|    | c |          |          |          |          |         |                                                            |   | 14844  | 3737   | 0.05 | 0.02 |
|    | d |          |          |          |          |         |                                                            |   | 32036  | 9429   | 0.10 | 0.06 |
|    | e |          |          |          |          |         |                                                            |   | 0      | 2378   | 0.00 | 0.01 |
|    | f |          |          |          |          |         |                                                            |   | 11911  | 4167   | 0.04 | 0.02 |
|    | g |          |          |          |          |         |                                                            |   | 0      | 3690   | 0.00 | 0.02 |
|    | a |          |          |          |          |         |                                                            |   | 0      | 6792   | 0.00 | 0.04 |
|    | b |          |          |          |          |         |                                                            |   | 67612  | 29147  | 0.22 | 0.17 |
|    | c |          |          |          |          |         |                                                            |   | 312769 | 79496  | 1.01 | 0.47 |
|    |   |          |          |          |          |         |                                                            |   | 186692 | 84410  | 0.60 | 0.50 |

|                            |   |          |          |          |          |          |                                                            |   |            |            |            |            |
|----------------------------|---|----------|----------|----------|----------|----------|------------------------------------------------------------|---|------------|------------|------------|------------|
| 84                         | d | 3372.190 | 3687.430 | 1844.219 | 1229.815 | 922.613  | (Hex)4 (HexNAc)4 (Deoxyhexose)1 (NeuAc)3 + (Man)3(GlcNAc)2 | 3 | 332562     | 100673     | 1.07       | 0.59       |
|                            | e |          |          |          |          |          |                                                            |   | 70751      | 30479      | 0.23       | 0.18       |
|                            | f |          |          |          |          |          |                                                            |   | 21880      | 9828       | 0.07       | 0.06       |
|                            | g |          |          |          |          |          |                                                            |   | 39097      | 6851       | 0.13       | 0.04       |
|                            | h |          |          |          |          |          |                                                            |   | 18317      | 5332       | 0.06       | 0.03       |
|                            | i |          |          |          |          |          |                                                            |   | 16439      | 2034       | 0.05       | 0.01       |
| 85                         | a | 3446.227 | 3761.467 | 1881.237 | 1254.494 | 941.123  | (Hex)5 (HexNAc)5 (Deoxyhexose)1 (NeuAc)2 + (Man)3(GlcNAc)2 | 3 | 16913      | 9019       | 0.05       | 0.05       |
|                            | b |          |          |          |          |          |                                                            |   | 27102      | 15033      | 0.09       | 0.09       |
|                            | c |          |          |          |          |          |                                                            |   | 22940      | 14890      | 0.07       | 0.09       |
|                            | d |          |          |          |          |          |                                                            |   | 21249      | 7510       | 0.07       | 0.04       |
| 86                         | a | 3663.286 | 3978.526 | 1989.767 | 1326.847 | 995.387  | (Hex)4 (HexNAc)4 (Deoxyhexose)1 (NeuAc)4 + (Man)3(GlcNAc)2 | 3 | 94775      | 40097      | 0.31       | 0.24       |
|                            | b |          |          |          |          |          |                                                            |   | 172449     | 67796      | 0.56       | 0.40       |
|                            | c |          |          |          |          |          |                                                            |   | 3413       | 0          | 0.01       | 0.00       |
| 87                         | a | 3737.322 | 4052.562 | 2026.785 | 1351.526 | 1013.896 | (Hex)5 (HexNAc)5 (Deoxyhexose)1 (NeuAc)3 + (Man)3(GlcNAc)2 | 4 | 80645      | 33400      | 0.26       | 0.20       |
|                            | b |          |          |          |          |          |                                                            |   | 16342      | 9487       | 0.05       | 0.06       |
|                            | c |          |          |          |          |          |                                                            |   | 47951      | 19191      | 0.15       | 0.11       |
|                            | d |          |          |          |          |          |                                                            |   | 18652      | 6158       | 0.06       | 0.04       |
|                            | e |          |          |          |          |          |                                                            |   | 24180      | 2425       | 0.08       | 0.01       |
|                            | f |          |          |          |          |          |                                                            |   | 16927      | 4451       | 0.05       | 0.03       |
| 88                         | a | 4028.418 | 4343.658 | 2172.333 | 1448.558 | 1086.670 | (Hex)5 (HexNAc)5 (Deoxyhexose)1 (NeuAc)4 + (Man)3(GlcNAc)2 | 4 | 18754      | 8800       | 0.06       | 0.05       |
|                            | b |          |          |          |          |          |                                                            |   | 32755      | 5385       | 0.11       | 0.03       |
|                            | c |          |          |          |          |          |                                                            |   | 2068       | 0          | 0.01       | 0.00       |
|                            | d |          |          |          |          |          |                                                            |   | 65889      | 14404      | 0.21       | 0.08       |
|                            | e |          |          |          |          |          |                                                            |   | 8858       | 1695       | 0.03       | 0.01       |
|                            | f |          |          |          |          |          |                                                            |   | 5730       | 0          | 0.02       | 0.00       |
|                            | g |          |          |          |          |          |                                                            |   | 2440       | 0          | 0.01       | 0.00       |
|                            | h |          |          |          |          |          |                                                            |   | 11412      | 3693       | 0.04       | 0.02       |
| 89                         | a | 4102.455 | 4417.695 | 2209.351 | 1473.237 | 1105.180 | (Hex)6 (HexNAc)6 (Deoxyhexose)1 (NeuAc)3 + (Man)3(GlcNAc)2 | 4 | 8101       | 2343       | 0.03       | 0.01       |
|                            | b |          |          |          |          |          |                                                            |   | 24688      | 4661       | 0.08       | 0.03       |
|                            | c |          |          |          |          |          |                                                            |   | 23205      | 8699       | 0.07       | 0.05       |
|                            | d |          |          |          |          |          |                                                            |   | 19939      | 4765       | 0.06       | 0.03       |
|                            | e |          |          |          |          |          |                                                            |   | 6466       | 3046       | 0.02       | 0.02       |
|                            | f |          |          |          |          |          |                                                            |   | 22542      | 6653       | 0.07       | 0.04       |
|                            | g |          |          |          |          |          |                                                            |   |            |            |            |            |
|                            | h |          |          |          |          |          |                                                            |   |            |            |            |            |
| SUM of Hign Man            |   |          |          |          |          |          |                                                            |   | 14,244,750 | 6,258,944  | 45.8659293 | 36.9276074 |
| SUM without Hign Man       |   |          |          |          |          |          |                                                            |   | 31,057,367 | 16,949,227 | 100        | 100        |
| SUM with Hign Man (=Total) |   |          |          |          |          |          |                                                            |   | 45,302,117 | 23,208,171 | 145.865929 | 136.927607 |

## Supplemental Table S2

| Name                       | sequence                                                        |
|----------------------------|-----------------------------------------------------------------|
| h-Fut8-Fw                  | ATAGGATCCGCCACCATGCGGCCATGGACTGGTTC                             |
| h-Fut8-GlyLinker           | ATTCTGGCCCCAAAATAGT                                             |
| h-FUT8-4GlyLinker-oligo-Fw | ggcggcggcggcGAAACGGTCAAGTACCCACATATCCTGAGGCTGAGAAATAAg          |
| h-FUT8-4GlyLinker-oligo-Rv | aattcTTATTTCTCAGCCTCAGGATATGTGGGGTACTTGACCGTTTCgcccggccggcc     |
| h-FUT8-6GlyLinker-oligo-Fw | ggcggcggcggcggcggcGAAACGGTCAAGTACCCACATATCCTGAGGCTGAGAAATAAg    |
| h-FUT8-6GlyLinker-oligo-Rv | aattcTTATTTCTCAGCCTCAGGATATGTGGGGTACTTGACCGTTTCgcccggccggccggcc |
| h-Fut8-coloP               | GTCTGACTGAGGTAGTATAGATCC                                        |
| h-Fut8-seq1                | CAGATGGAGCAGGTGATTGG                                            |
| h-Fut8-seq2                | ATAGAAGAAGCCACCAAGAAGC                                          |
| FUT8 seq3                  | AATACTTGATCCGCCACAG                                             |
| FUT8 seq4                  | AGTTATTGGAGTCCATGTCAGACG                                        |
| h-Fut8-IH Fw               | TCGGAATTCCGGATACCAGAAGGCCCTAT                                   |
| h-Fut8-IH Rv               | tatcggcggcgtTATTTCTCAGCCTCAGGAT                                 |
| FUT8 Asp519Ala Fw          | CTACCAACCCCCGAAGTGCAGcGAAATTCCCATGGAACCTGG                      |
| FUT8 Asp519Ala Rv          | CCAGGTCCATGGGAATTTcagcTGCAGTTCGGGGTTGGTGAG                      |
| FUT8 His535Ala FW          | TCATTGGTGTGGCTGGAAATgctTGGGATGGCTATTCTAAAGG                     |
| FUT8 His535Ala Rv          | CCTTTAGAATAGCCATCCCAgcaATTCCAGCCACACCAATGA                      |
| FUT8 Lys541Ala FW          | ATCATTTGGGATGGCTATTCTgcAGGTGTCAACAGGAAATTTGGG                   |
| FUT8 Lys541Ala Rv          | CCCAATTTCTGTTGACACCTgcAGAATAGCCATCCCAATGAT                      |
| FUT8 Val543Ala Fw          | GGGATGGCTATTCTAAAGGTGccAACAGGAAATTTGGGAAGGAC                    |
| FUT8 Val543Ala Rv          | GTCCCTTCCCAATTTCTGTTggCACCTTTAGAATAGCCATCCC                     |
| FUT8 Arg545Ala FW          | GCTATTCTAAAGGTGTCAACgcgAAATTTGGGAAGGACGGGCCT                    |
| FUT8 Arg545Ala RV          | AGGCCCGTCTTCCCAATTTcgcGTTGACACCTTTAGAATAGC                      |
| FUT8 Thr550Leu552Ala Fw    | ACAGGAAATTTGGGAAGGgcGGCgcaTATCCCTCCTACAAAGT                     |
| FUT8 Thr550Leu552Ala Rv    | ACTTTGTAGGAGGGATatgcGCCgcCCTTCCCAATTTCTCTGT                     |
| FUT8 Thr550Ala Fw          | TCAACAGGAAATTTGGGAAGGgCGGGCCTATATCCCTCCTACAA                    |
| FUT8 Thr550Ala Rv          | TTGTAGGAGGGATATAGGCCCGcCCTTCCCAATTTCTCTGTGA                     |
| FUT8 Leu552Ala Fw          | GGAAATTTGGGAAGGACGGGCgcATATCCCTCCTACAAAGTTCG                    |
| FUT8 Leu552Ala Rv          | CGAACTTTGTAGGAGGGATatgcGCCCGTCTTCCCAATTTCC                      |
